1 **Brief Report for Submission to medRxiv**

2 **Running Title:** Trematodiasis in California?

3 **Keywords:** invasive species, neglected diseases, *Haplorchis*, *Centrocestus*, *Philophthalmus*

4 **Title:** Potential for emergence of foodborne and waterborne trematodiasis in California

5 **Authors:** Daniel C.G. Metz, Andrew V. Turner, Alexandria P. Nelson, Ryan F. Hechinger\*

6 **Orcid IDs:** DCGM: 0000-0002-3502-2416; RFH: 0000-0002-6633-253X

7 **Affiliation:** University of California—San Diego, La Jolla, CA, USA (all authors)

8 \*Corresponding author: Ryan F. Hechinger; Scripps Institution of Oceanography; University of  
9 California; 9500 Gilman Drive #0202; La Jolla, CA, 92093-0202; tele: (858) 220-8560; email:  
10 [rhechinger@ucsd.edu](mailto:rhechinger@ucsd.edu)

11 **Author contributions:** DM & RH: project conception, data acquisition, data analysis,  
12 manuscript drafting; AT & AN: data acquisition, manuscript editing.

13 **Abstract—47 words**

14 We document that three human-pathogenic zoonotic trematodes are introduced and widespread  
15 throughout southern California in their first intermediate host snail (*Melanooides tuberculata*). We  
16 highlight the need to consider these introductions from a public health perspective in California  
17 and elsewhere in the United States the snail has invaded.

18 **Text—words 1184, refs 30**

19 Foodborne trematodiasis are among the most important neglected infectious diseases of the  
20 world, with up towards a billion people estimated to be at risk (Hotez et al. 2008, Keiser &  
21 Utzinger 2009, Fürst et al. 2012). These diseases involve a wide range of pathologies, including  
22 abdominal pain, chronic cough, hepatomegaly, bile-duct cancer, and brain hemorrhage (Chai et  
23 al. 2005, Keiser & Utzinger 2009, Sripa et al. 2010). Foodborne trematodiasis result from  
24 infection by trematode flatworms that transmit to people who eat second intermediate host  
25 organisms carrying infectious metacercariae, which, in turn, originate from larval stages using  
26 first intermediate host snails. Foodborne trematodiasis have not historically been a major public  
27 health concern in the United States, probably given a lack of snails known to transmit injurious  
28 trematodes. However, the introduction of one such snail in recent decades opens the door for the  
29 emergence of foodborne trematodiasis in the United States.

30 The snail *Melanoides tuberculata* serves as first intermediate host for at least 11 human-  
31 infecting trematode species (Pinto & Melo 2011). Although native to Asia and Africa, the snail  
32 has been introduced around the world, including in the Americas from the United States to  
33 southern Brazil (Murray 1971, Facon et al. 2003, Coelho et al. 2018, CABI 2020, Chalkowski et  
34 al. 2021). At least three human-pathogenic, zoonotic trematodes have been co-introduced with  
35 the snail in the Americas (see Scholz et al. 2001, Pinto & Melo 2011 and refs therein), including  
36 reports in the continental United States of all three species in Texas (Nollen & Murray 1978,  
37 Mitchell et al. 2000, Tolley-Jordan & Owen 2008), one in Arizona (Church et al. 2013), and  
38 another in Utah and Florida (Mitchell et al. 2005). However, *M. tuberculata* is much more  
39 widespread throughout the United States (Chalkowski et al. 2021) than the few places the  
40 trematodes have been reported. Because these trematodes are dispersed by birds, there is a high  
41 probability that the parasites will also be much more widespread in the United States than  
42 currently recognized. Despite this possibility, and in contrast to elsewhere in the Americas (e.g.,  
43 Pulido-Murillo et al. 2018, Lopes et al. 2020), there appears to have been no substantial  
44 consideration from a public health perspective of the introduction of *M. tuberculata* and its suite  
45 of trematodes in the United States (but see Murray (1971) and Chalkowski et al. (2021)). Here,  
46 we document that the snail, its three human-pathogenic trematodes known from elsewhere in the  
47 Americas, and several other trematodes potentially introduced to the Americas, are all  
48 established in areas of possibly high exposure risk throughout southern California, one of the  
49 most populous metropolitan areas in the United States.

50 In September 2019, we discovered several *M. tuberculata* at a San Diego fishing locality that  
51 were infected with *Haplorchis pumilio*, a foodborne human-pathogenic trematode. The finding  
52 was surprising because, at that time, not even the snail was reported in the literature as being  
53 present in California, nor was it included in the California Department of Fish and Wildlife's list  
54 of invasive invertebrates (<https://wildlife.ca.gov/Conservation/Invasives/Species>) (but now see  
55 Chalkowski et al. 2021). However, observations and data on GBIF.org and iNaturalist.org  
56 revealed that *M. tuberculata* was widespread throughout southern California (Figure 1). Given  
57 the high probability that the snail's trematodes would also be widespread, we initiated a broader  
58 sampling of southern California. We restricted our focus to freshwater fishing localities, as the  
59 most medically important trematodes transmitted by *M. tuberculata* elsewhere in the Americas  
60 are fishborne.

61 We have thus far hand or dip-net collected live *M. tuberculata* from the shallow waters  
62 (<1.2 m) of five southern California fishing localities (Figure 1, Table 1). We dissected snails  
63 within 48 hours of collection to identify trematode infections, using microscopical examination  
64 to compare worm morphology to literature descriptions (see refs in Pinto & Melo 2011). We  
65 extracted genomic DNA from one to five cercariae per infected snail in 1  $\mu$ L of a 2 mg mL<sup>-1</sup>  
66 proteinase K solution (Qiagen), then amplified 28S rDNA using existing primers (dig12 and  
67 1500R from Tkach et al. (2003)) and PCR protocols (slightly modified from Tkach et al. (2003)).  
68 We examined PCR products on a 1x TBE agarose gel before shipping successful products to  
69 Eton Biosciences (San Diego, CA) for Sanger sequencing services. We used MEGA X (Stecher  
70 et al. 2020) to trim the trace files by eye prior to a discontinuous megaBLAST comparing each  
71 sequence to all 28S Platyhelminthes sequences present in GenBank (<http://www.ncbi.nlm.nih.gov>)  
72 as of September 2021. We archived newly generated sequences in GenBank (Table 1).

74

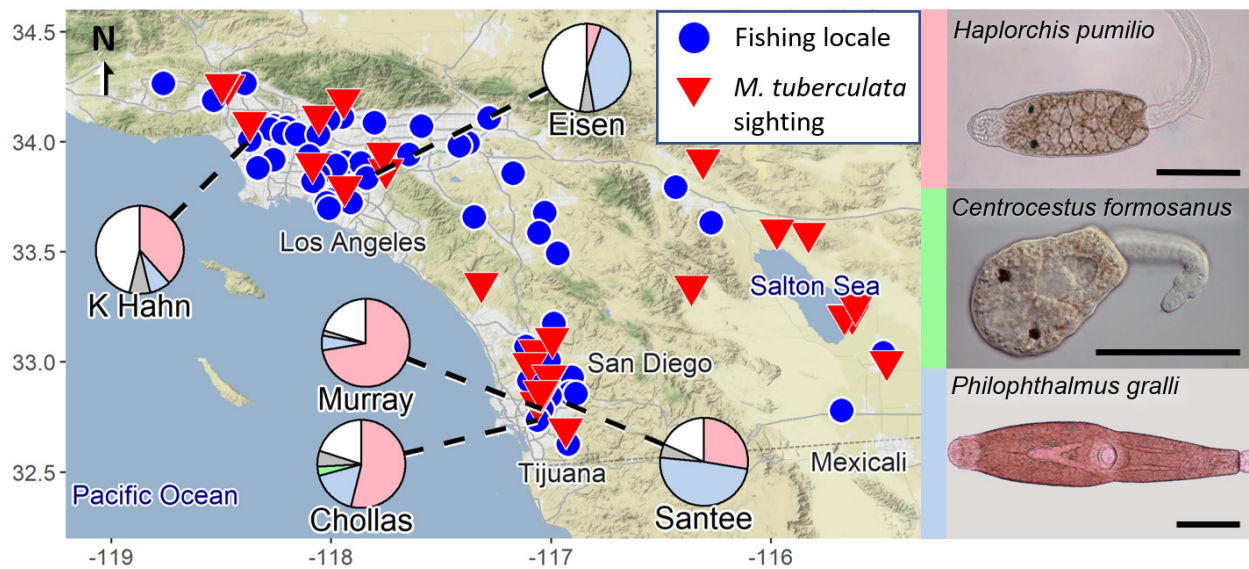

75

76 **Figure 1.** The introduced snail, *Melanoides tuberculata*, and three of its human-pathogenic trematode parasites are  
77 widespread throughout southern California. The 25 sites with research-grade *M. tuberculata* observations from  
78 iNaturalist.org (bottom points of red inverted triangles) are well-interspersed among the 55 fishing sites (blue  
79 circles) listed by the California Department of Fish & Wildlife at elevations likely suitable for *M. tuberculata*  
80 survival. Surveyed sites are marked by dashed lines leading from pie charts: K Hahn = Kenneth Hahn State  
81 Recreation Area (Los Angeles County), Eisen = Eisenhower Park (Orange Co.), Murray = Murray Reservoir (San  
82 Diego Co.), Chollas = Chollas Lake Park (San Diego Co.), Santee = Santee Lakes Recreation Preserve (San Diego  
83 Co.). Pie charts indicate parasite prevalence at each surveyed site: green = *Haplorchis pumilio*, gold =  
84 *Philophthalmus gralli*, purple = *Centrocestus formosanus*, gray = other non-human-pathogenic trematodes, white =  
85 uninfected snails. Photographs of heat-stunned, unstained cercariae of each human-pathogenic trematode are coded  
86 to their respective color on the pie charts. Scale bar = 100 μm.

87

88 *M. tuberculata* harbored introduced trematode infections at each of the five localities. Two  
89 trematode species morphologically and genetically (99.8-100%) matched the fishborne  
90 trematodes *Haplorchis pumilio* and *Centrocestus formosanus*, which are introduced elsewhere in  
91 the Americas (Mitchell et al. 2000, Scholz & Salgado-Maldonado 2000, Tolley-Jordan & Owen  
92 2008, Pulido-Murillo et al. 2018, Lopes et al. 2020). *H. pumilio* was the most common  
93 trematode, being present at each locality at relatively high prevalences (Table 1, Figure 1). These  
94 introduced heterophyids have garnered attention given the impacts on second intermediate host  
95 fish (e.g., Mitchell et al. 2000, Mitchell et al. 2005, Huston et al. 2014). However, like other  
96 heterophyids, the adult stages of these trematodes cause a wide range of pathologies in humans,  
97 sometimes possibly being deadly (Keiser & Utzinger 2009, Sripa et al. 2010, Chai & Jung 2017).  
98 People are infected when eating raw, undercooked, or pickled second intermediate host fish, or  
99 via utensil contamination. Because these parasites occur in fishing localities, can infect a wide  
100 range of fishes, and fish are commonly eaten in California, including uncooked as ceviche, poke,  
101 and sushi (unpub. obs.), there is a real possibility for *H. pumilio* and *C. formosanus* to cause  
102 foodborne trematodiasis in California and elsewhere in the United States.

**Table 1.** Prevalences ( $\pm 95\%$  CI\*) of human-infecting and other trematode species in the introduced first intermediate host snail *Melanooides tuberculata* from our initial sample sites in southern California, USA.

| Parasite                                    | Locality <sup>†</sup> |                  |                  |                      |                       | Average among sites (weighted by n) |
|---------------------------------------------|-----------------------|------------------|------------------|----------------------|-----------------------|-------------------------------------|
|                                             | San Diego Co.         |                  |                  | Orange Co.           | Los Angeles Co.       |                                     |
|                                             | Murray Reservoir      | Santee Lakes     | Chollas Lake     | Eisenhower Park Lake | Kenneth Hahn SRA Lake |                                     |
| <i>Haplorchis pumilio</i> <sup>‡</sup>      | 72.2 (59.1-82.4)      | 27.8 (19.9-37.5) | 55.4 (49.7-61)   | 5.3 (0.3-24.6)       | 38.5 (17.7-64.5)      | 49.3                                |
| <i>Philophthalmus gralli</i> <sup>‡</sup>   | 5.6 (1.9-15.1)        | 49.5 (39.7-59.3) | 17.2 (13.4-21.9) | 42.1 (23.1-63.7)     | 7.7 (0.4-33.3)        | 23.2                                |
| <i>Centrocestus formosanus</i> <sup>‡</sup> | 0 (0-6.6)             | 0 (0-3.8)        | 3.4 (1.8-6.1)    | 0 (0-16.8)           | 0 (0-22.8)            | 2.1                                 |
| Renicolid sp. 1 <sup>§</sup>                | 0 (0-6.6)             | 4.1 (1.6-10.1)   | 4.7 (2.8-7.8)    | 0 (0-16.8)           | 0 (0-22.8)            | 3.7                                 |
| Renicolid sp. 2 <sup>¶</sup>                | 0 (0-6.6)             | 0 (0-3.8)        | 0.7 (0.2-2.4)    | 0 (0-16.8)           | 0 (0-22.8)            | 0.4                                 |
| Renicolid sp. 3 <sup>#</sup>                | 0 (0-6.6)             | 1 (0.1-5.6)      | 0 (0-1.3)        | 0 (0-16.8)           | 0 (0-22.8)            | 0.2                                 |
| Lecithodendriid gen. sp.**                  | 1.9 (0.1-9.8)         | 0 (0-3.8)        | 0.3 (0-1.9)      | 5.3 (0.3-24.6)       | 7.7 (0.4-33.3)        | 0.8                                 |
| Plagiorchiid? sp. 1 <sup>††</sup>           | 0 (0-6.6)             | 0 (0-3.8)        | 0.3 (0-1.9)      | 0 (0-16.8)           | 0 (0-22.8)            | 0.2                                 |
| Uninfected                                  | 20.4 (11.8-32.9)      | 18.6 (12.1-27.4) | 20.6 (16.4-25.6) | 47.4 (27.3-68.3)     | 46.2 (23.2-70.9)      | 21.9                                |
| Total no. snails <sup>‡‡</sup>              | 54                    | 97               | 296              | 19                   | 13                    | 479                                 |

\*95% CIs calculated via Wilson Score method.

<sup>†</sup> Sampling dates (all in 2021): Murray (5 May, 20 Jun), Santee (10 Jun), Chollas (23 Jun, 12 Jul), Eisenhower (16 Jul), Kenneth Hahn (1 Jul).

<sup>‡</sup> Human infecting. GenBank accession nos.: *H. pumilio* (OK335796-OK335799), *P. gralli* (OK335800-OK335802), *C. formosanus* (OK335803-OK335804)

<sup>§</sup> A large, white renicolid not previously reported from *M. tuberculata*, at least in the Americas. Renicolids infect the kidneys of birds as final host. GenBank accession nos.: OK335805-OK335806

<sup>¶</sup> A brownish renicolid, potentially identical to *Cercariae Indicae* XIV described from India (see ref in Pinto & Melo 2011), which may be identical to the "*Renicola* sp." in Brazil of ref (Pinto & Melo 2012). Renicolids infect the kidneys of bird final hosts. GenBank accession nos. OK338507-OK338508

<sup>#</sup> A renicolid xiphidiocercaria, morphological match with *Cercaria Levantina* 12 described from Israel (see ref in Pinto & Melo 2011). Renicolids infect the kidneys of bird final hosts.

\*\* Morphologically and genetically (99.8%) matches "*Lecithodendriidae* gen. sp." of ref (Lopes et al. 2021), which may be introduced to the Americas (Lopes et al. 2021). Likely infects bats as final host. GenBank accession nos. OK335156-OK335157.

<sup>††</sup> An "Armata" cercaria not previously reported from *M. tuberculata*, at least in the Americas. Likely infects an ectothermic vertebrate as final host.

<sup>‡‡</sup> Nine double infections were included in the counts, causing column totals to not always match the total number snails examined.

103 The other encountered human-pathogenic trematode morphologically and genetically (99.6-  
 104 100%) matched *Philophthalmus gralli*, which is also reported from *M. tuberculata* in Arizona  
 105 (Church et al. 2013), Texas (Nollen & Murray 1978) and farther south in the Americas (Diaz et  
 106 al. 2002, Chalkowski et al. 2021). *P. gralli* infects humans via ingestion of aquatic hosts  
 107 harboring metacercariae or by direct contact with swimming infectious cercariae.  
 108 *Philophthalmus* species can infect the eyes of humans and cause conjunctivitis (Gutierrez et al.  
 109 1987), with a recent case in Texas (Sapp et al. 2019). *P. gralli* can also cause substantial  
 110 problems in captive birds (e.g., Greve & Harrison 1980, Church et al. 2013). Although *P. gralli*  
 111 may be of less human health concern than the above two species, it was the second most  
 112 common trematode (Table 1) among the three introduced human-infecting trematodes  
 113 transmitted by *M. tuberculata* in California and elsewhere in the United States.

114 We detected five additional trematode species, including two not previously reported from  
115 *M. tuberculata* in the Americas, all of which are possibly introduced (Table 1). These species are  
116 likely of little direct public health concern given their probable life cycles, but they may be of  
117 veterinary interest (Table 1). However, if they do represent novel introductions to the Americas,  
118 their presence highlights that additional foodborne trematodes transmitted by *M. tuberculata* in  
119 its native range may also be introduced here. Such trematodes include severely pathogenic  
120 trematodes such as the carcinogenic human liver flukes (*Clonorchis sinensis* and *Opisthorchis*  
121 species), and the lung fluke (*Paragonimus westermani*).

122 Hence, several factors suggest the possible emergence and even ongoing presence of  
123 foodborne trematodiasis in California: (1) the introduced *M. tuberculata* snail is widespread,  
124 including at localities where people catch fish for eating; (2) the snail carries at least three of its  
125 human-pathogenic trematodes, including two that are fishborne; and (3) the snail also carries  
126 several other potentially introduced trematodes, indicating the possibility that additional human-  
127 pathogenic trematodes are already introduced or may be introduced in the future. Taken together,  
128 these factors clearly call for additional consideration of *M. tuberculata* from a public and  
129 veterinary health perspective in California and wherever else the snail is present in the United  
130 States.

### 131 **Acknowledgements**

132 We thank Emma Palmer, Jordan Ingco and Taylor Ackerknecht for field/laboratory assistance.  
133 This work was supported by the US National Institutes of Health Grant# 1R03AI156569-01.

### 134 **References**

- 135 CABI (2020) Datasheet: *Melanoides tuberculata* (red-rimmed melania) [original text by B Facon  
136 and JP Pointier]. Invasive Species Compendium. CAB International, Wallingford, UK
- 137 Chai J-Y, Darwin Murrell K, Lymbery AJ (2005) Fish-borne parasitic zoonoses: Status and  
138 issues. *Int J Parasitol* 35:1233-1254
- 139 Chai J-Y, Jung B-K (2017) Fishborne zoonotic heterophyid infections: An update. *Food and*  
140 *Waterborne Parasitology* 8-9:33-63
- 141 Chalkowski K, Abigail M, Christopher AL, Sarah Z (2021) Spread of an Avian Eye Fluke,  
142 *Philophthalmus gralli*, through Biological Invasion of an Intermediate Host. *J Parasitol*  
143 107:336-348
- 144 Church ML, Barrett PM, Swenson J, Kinsella JM, Tkach VV (2013) Outbreak of  
145 *Philophthalmus gralli* in four greater rheas (*Rhea americana*). *Vet Ophthalmol* 16:65-72
- 146 Coelho PN, Fernandez MA, Cesar DAS, Ruocco AMC, Henry R (2018) Updated distribution  
147 and range expansion of the gastropod invader *Melanoides tuberculata* (Muller, 1774) in  
148 Brazilian waters. *Bioinvasions Records* 7:405-409

- 149 Diaz MT, Hernandez LE, Bashirullah AK (2002) Experimental life cycle of *Philophthalmus*  
150 *gralli* (Trematoda : Philophthalmidae) in Venezuela. Rev Biol Trop 50:629-641
- 151 Facon B, Pointier JP, Glaubrecht M, Poux C, Jarne P, David P (2003) A molecular  
152 phylogeography approach to biological invasions of the New World by parthenogenetic  
153 Thiarid snails. Mol Ecol 12:3027-3039
- 154 Fürst T, Keiser J, Utzinger J (2012) Global burden of human food-borne trematodiasis: a  
155 systematic review and meta-analysis. The Lancet Infectious Diseases 12:210-221
- 156 Greve JH, Harrison GJ (1980) Conjunctivitis caused by eye flukes in captive-reared ostriches. J  
157 Am Vet Med Assoc 177:909-910
- 158 Gutierrez Y, Grossniklaus HE, Annable WL (1987) Human conjunctivitis caused by the bird  
159 parasite *Philophthalmus*. American Journal of Ophthalmology 104:417-419
- 160 Hotez PJ, Brindley PJ, Bethony JM, King CH, Pearce EJ, Jacobson J (2008) Helminth infections:  
161 the great neglected tropical diseases. Journal of Clinical Investigation 118:1311-1321
- 162 Huston DC, Worsham MD, Huffman DG, Ostrand KG (2014) Infection of fishes, including  
163 threatened and endangered species by the trematode parasite *Haplorchis pumilio* (Looss,  
164 1896) (Trematoda: Heterophyidae). Bioinvasions Records 3:189-194
- 165 Keiser J, Utzinger J (2009) Food-Borne Trematodiasis. Clinical Microbiology Reviews 22:466-  
166 483
- 167 Lopes AS, Pulido-Murillo EA, López-Hernández D, Melo ALd, Pinto HA (2021) First report of  
168 *Melanoides tuberculata* (Mollusca: Thiaridae) harboring a xiphidiocercaria in Brazil: A new  
169 parasite introduced in the Americas? Parasitol Int 82:102284
- 170 Lopes AS, Pulido-Murillo EA, Melo AL, Pinto HA (2020) *Haplorchis pumilio* (Trematoda:  
171 Heterophyidae) as a new fish-borne zoonotic agent transmitted by *Melanoides tuberculata*  
172 (Mollusca: Thiaridae) in Brazil: A morphological and molecular study. Infection, genetics  
173 and evolution : journal of molecular epidemiology and evolutionary genetics in infectious  
174 diseases 85:104495-104495
- 175 Mitchell AJ, Overstreet RM, Goodwin AE, Brandt TM (2005) Spread of an exotic fish-gill  
176 trematode. Fisheries 30:11-16
- 177 Mitchell AJ, Salmon MJ, Huffman DG, Goodwin AE, Brandt TM (2000) Prevalence and  
178 pathogenicity of a heterophyid trematode infecting the gills of an endangered fish, the  
179 fountain darter, in two central Texas spring-fed rivers. J Aquat Anim Health 12:283-289
- 180 Murray HD (1971) The introduction and spread of thiarids in the USA. Biologist (Charlest)  
181 53:133-135

- 182 Nollen PM, Murray HD (1978) *Philophthalmus gralli* - identification, growth characteristics, and  
183 treatment of an oriental eyefluke of birds introduced into continental United States. J  
184 Parasitol 64:178-180
- 185 Pinto HA, Melo AL (2011) A checklist of trematodes (Platyhelminthes) transmitted by  
186 *Melanoides tuberculata* (Mollusca: Thiaridae). Zootaxa:15-28
- 187 Pinto HA, Melo AL (2012) *Melanoides tuberculata* (Mollusca: Thiaridae) harboring renicolid  
188 cercariae (Trematoda: Rencolidae) in Brazil. J Parasitol 98:784-787
- 189 Pulido-Murillo EA, Furtado LFV, Melo AL, Rabelo EML, Pinto HA (2018) Fishborne Zoonotic  
190 Trematodes Transmitted by *Melanoides tuberculata* Snails, Peru. Emerg Infect Dis 24:606-  
191 608
- 192 Sapp SGH, Alhabshan RN, Bishop HS, Fox M, Ndubuisi M, Snider CE, Bradbury RS (2019)  
193 Ocular Trematodiasis Caused by the Avian Eye Fluke *Philophthalmus* in Southern Texas.  
194 Open Forum Infectious Diseases 6
- 195 Scholz T, Aguirre-Macedo ML, Salgado-Maldonado G (2001) Trematodes of the family  
196 Heterophyidae (Digenea) in Mexico: a review of species and new host and geographical  
197 records. J Nat Hist 35:1733-1772
- 198 Scholz T, Salgado-Maldonado G (2000) The Introduction and Dispersal of *Centrocestus*  
199 *formosanus* (Nishigori, 1924) (Digenea: Heterophyidae) in Mexico: A Review. The  
200 American Midland Naturalist 143:185-200
- 201 Sripa B, Kaewkes S, Intapan PM, Maleewong W, Brindley PJ (2010) Food-Borne Trematodiasis  
202 in Southeast Asia: Epidemiology, Pathology, Clinical Manifestation and Control. In: Zhou  
203 XN, Bergquist R, Olveda R, Utzinger J (eds) Advances in Parasitology, Vol 72: Important  
204 Helminth Infections in Southeast Asia: Diversity and Potential for Control and Elimination,  
205 Pt A, Book 72
- 206 Stecher G, Tamura K, Kumar S (2020) Molecular Evolutionary Genetics Analysis (MEGA) for  
207 macOS. Mol Biol Evol 37:1237-1239
- 208 Tkach VV, Littlewood DTJ, Olson PD, Kinsella JM, Swiderski Z (2003) Molecular phylogenetic  
209 analysis of the Microphalloidea Ward, 1901 (Trematoda: Digenea). Syst Parasitol 56:1-15
- 210 Tolley-Jordan LR, Owen JM (2008) Habitat influences snail community structure and trematode  
211 infection levels in a spring-fed river, Texas, USA. Hydrobiologia 600:29-40
- 212
- 213
